# Supplementary material for: Correction: Correction: Mechanism of Inhibition of the Human Sirtuin Enzyme SIRT3 by Nicotinamide: Computational and Experimental Studies
Source: PubMed Central journal article supplement (PMC4569365; doi:10.1371/journal.pone.0138393), 2015-09-14
Supplement: pone.0138393.s001.pdf [file pone.0138393.s001.pdf]

CORRECTION

# Correction: Mechanism of Inhibition of the Human Sirtuin Enzyme SIRT3 by Nicotinamide: Computational and Experimental Studies

Xiangying Guan, Ping Lin, Eric Knoll, Raj Chakrabarti

The expressions for  $K_1, K_2, K_3, K_m, NAD^+$  and  $v_{max}$  in Equation 3 are missing from the published article. Please view these expressions in [S1 File](#) of this correction.

## Supporting Information

**S1 File. Initial rate model for sirtuin deacetylation kinetics.**  
(PDF)

## Reference

1. Guan X, Lin P, Knoll E, Chakrabarti R (2014) Mechanism of Inhibition of the Human Sirtuin Enzyme SIRT3 by Nicotinamide: Computational and Experimental Studies. PLoS ONE 9(9): e107729. doi: [10.1371/journal.pone.0107729](https://doi.org/10.1371/journal.pone.0107729) PMID: [25221980](https://pubmed.ncbi.nlm.nih.gov/25221980/)

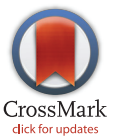

## OPEN ACCESS

**Citation:** Guan X, Lin P, Knoll E, Chakrabarti R (2015) Correction: Mechanism of Inhibition of the Human Sirtuin Enzyme SIRT3 by Nicotinamide: Computational and Experimental Studies. PLoS ONE 10(8): e0136127. doi:10.1371/journal.pone.0136127

**Published:** August 14, 2015

**Copyright:** © 2015 Guan et al. This is an open access article distributed under the terms of the [Creative Commons Attribution License](https://creativecommons.org/licenses/by/4.0/), which permits unrestricted use, distribution, and reproduction in any medium, provided the original author and source are credited.
